# Supplementary material
Source: PubMed Central journal article supplement (PMC7857716)
Supplement: JCOPDF-7-151-s001.pdf [file JCOPDF-7-151-s001.pdf]

### Supplementary figure 1a.

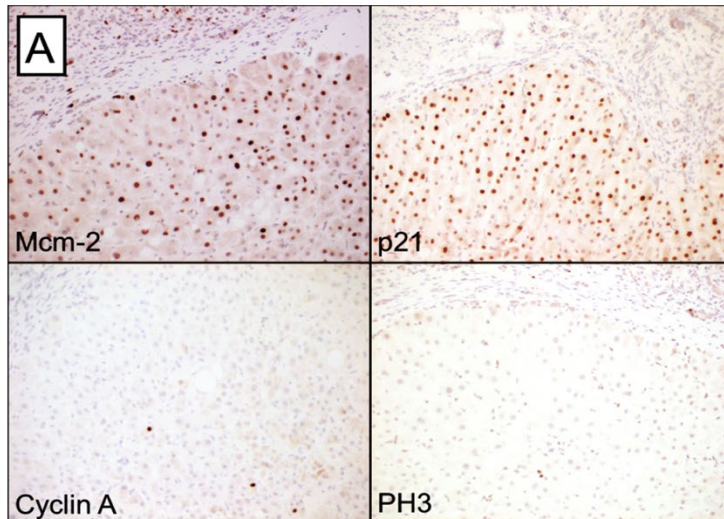

**Supplementary figure 1a.** Representative images of a liver section from a patient with cirrhosis. The edge of the same portal tract is shown in every image. Note frequent positive hepatocyte nuclear staining with both Mcm-2 and p21. Few or no hepatocytes expressed cyclin A or PH3. A few inflammatory cells have also stained positive for cyclin A and PH3 in this section and thus serve as an internal positive control.

### Supplementary figure 1b.

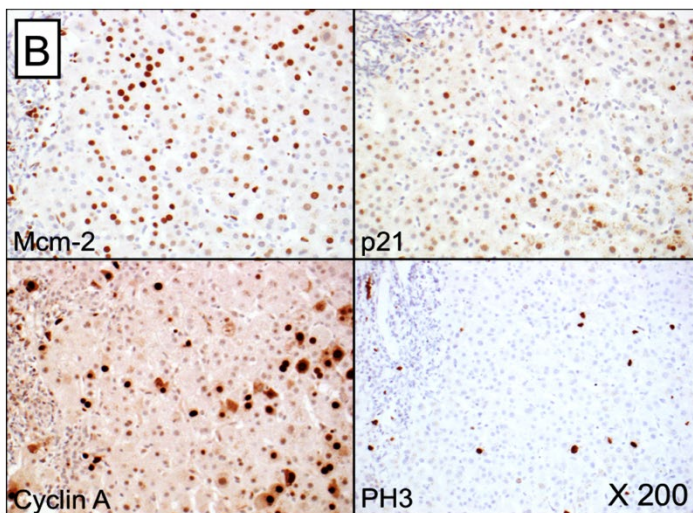

**Supplementary figure 1b.** For comparison with supplementary figure 1a, a liver section from a patient with regeneration after ischaemia-reperfusion injury. The edge of the same portal tract is shown in each image. Note positive hepatocyte nuclear staining with all four markers, with the highest proportion of positive cells for Mcm-2, then p21, cyclin A and PH3.

## Supplementary figure 2a

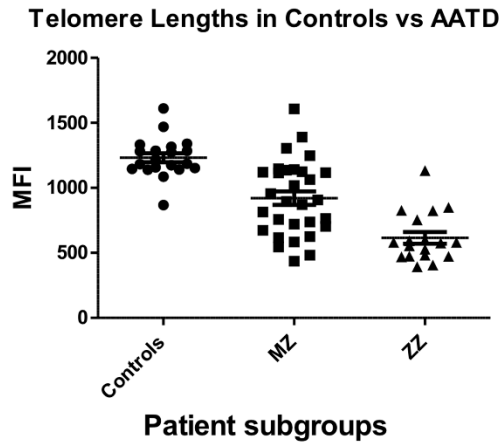

**Supplementary figure 2a.** Hepatocyte telomere lengths, expressed as mean fluorescent intensity (MFI), were reduced in patients with  $\alpha_1$ -antitrypsin deficiency, an effect that was more marked in those homozygous for the Z allele compared with those heterozygous for the Z allele.

## Supplementary figure 2b

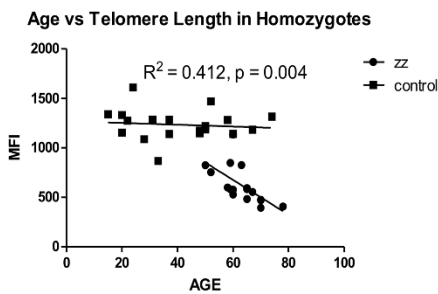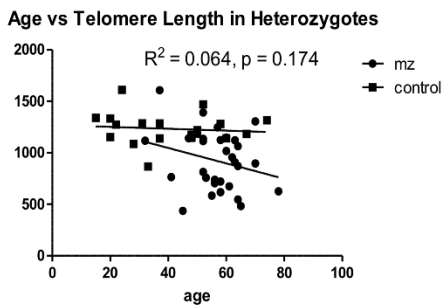

**Supplementary figure 2b.** Hepatocyte telomere lengths remain constant in healthy individuals with time but fall progressively with increasing age in patients with  $\alpha_1$ -antitrypsin deficiency. The rate of loss of telomere length with age was greater in those homozygous for the Z allele (top panel) when compared with those heterozygous for the Z allele (bottom panel).

### Supplementary figure 2c.

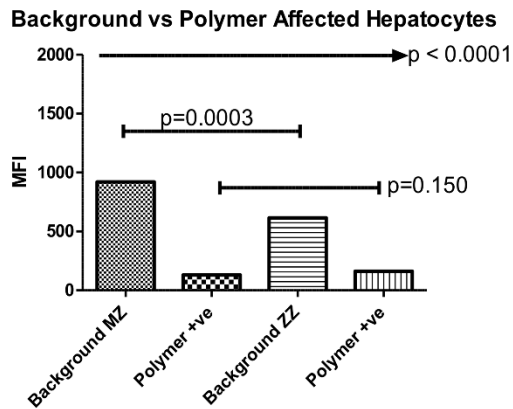

**Supplementary figure 2c.** Median hepatocyte telomere lengths measured in  $\alpha_1$ -antitrypsin polymer positive hepatocytes compared with  $\alpha_1$ -antitrypsin polymer negative hepatocytes in liver sections from patients with either homozygous or heterozygous  $\alpha_1$ -antitrypsin deficiency, suggesting a direct effect of the polymer on reduced telomere length.

### Supplementary figure 2d

#### Survival According to Total Telomere Length

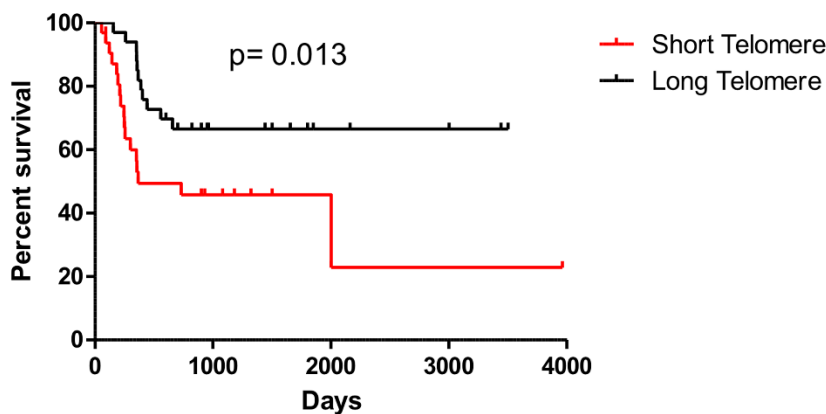

**Supplementary figure 2d.** Patients in whom the hepatocyte telomere length was below the median have an increased risk of liver-related mortality (red line) compared to those in whom the hepatocyte telomere length was above the median (black line).

### Supplementary figure 2e

**Survival Proportion According to Polymer TL**

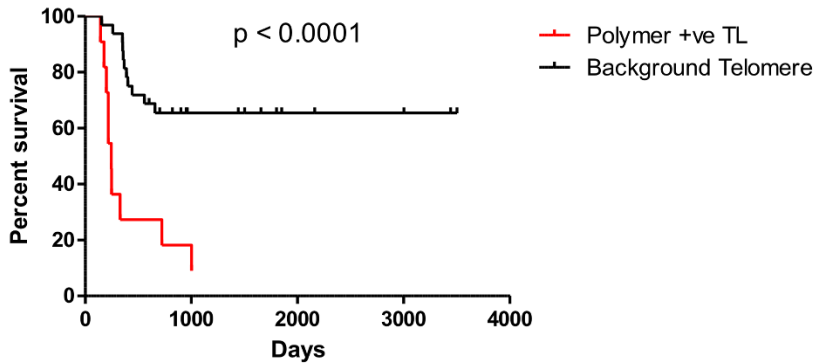

**Supplementary figure 2e.** The effect of hepatocyte telomere length on liver-related mortality was even more marked when only those hepatocytes expressing  $\alpha_1$ -antitrypsin polymers were analysed. Those with hepatocytes that expressed  $\alpha_1$ -antitrypsin polymers with telomeres shorter than the median had increased liver related mortality (red line) compared to those with telomeres longer than the median (black line).

### Supplementary figure 3a

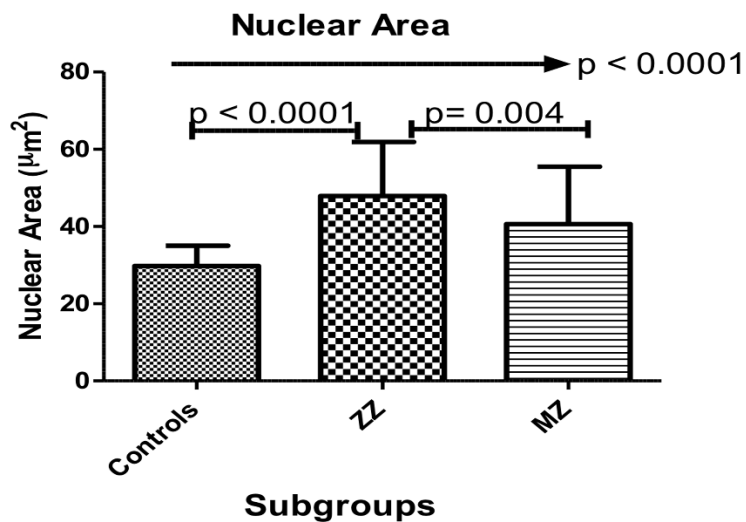

**Supplementary figure 3a.** Hepatocyte nuclear area increases in cellular senescence and was greater in patients with  $\alpha_1$ -antitrypsin deficiency when compared with controls, an effect that was more marked in those homozygous for the Z allele when compared with those heterozygous for the Z allele.

### Supplementary figure 3b

**Nuclear Area in Polymer Affected and Background Hepatocytes**

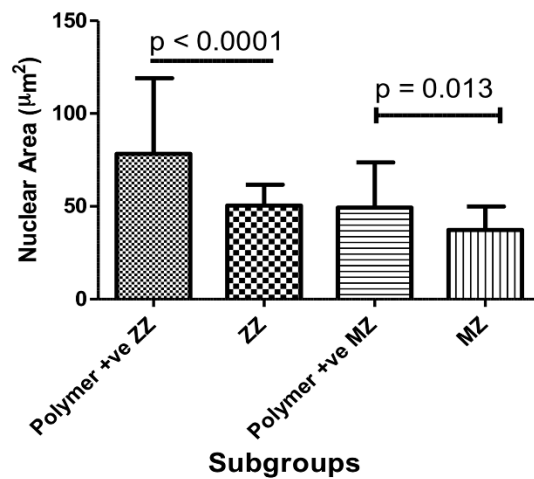

**Supplementary figure 3b.** Hepatocyte nuclear area was greater in patients with  $\alpha_1$ -antitrypsin deficiency within hepatocytes that expressed polymers when compared to hepatocytes in the same patients that did not express the polymer, again an effect that was more marked in those homozygous for the Z allele when compared with those heterozygous for the Z allele.

## Supplementary figure 3c

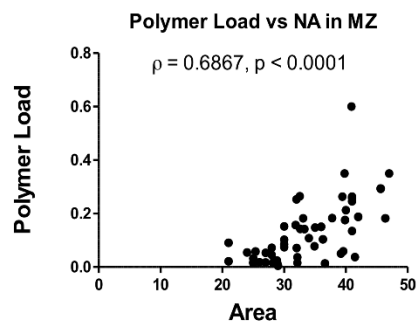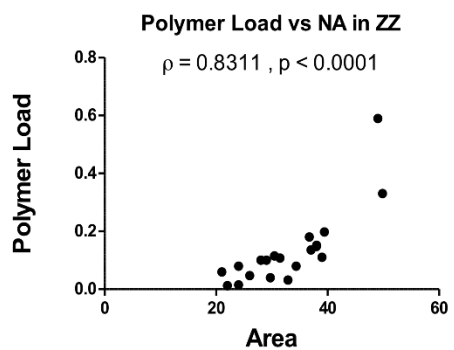

**Supplementary figure 3c.** Hepatocyte nuclear area increased in parallel with  $\alpha_1$ -antitrypsin polymer load in patients  $\alpha_1$ -antitrypsin deficiency, an effect that again was more marked in those homozygous for the Z allele (bottom panel) when compared with those heterozygous for the Z allele (top panel).
